# Supplementary material for: Optimizing inventory management: a causal inference-driven Bayesian network with transfer learning adaptation
Source: PeerJ journal article supplement (doi:10.7717/peerj-cs.3262), 2025-11-28
Supplement: CodebookStaffYH.docx [file CodebookStaffYH.docx]

## awesome_paper.md

这里收录了迁移学习各个研究领域的最新文章。
This file collects the latest papers across various research areas of transfer learning.

一篇最近的关于异构迁移学习的综述
A recent survey on heterogeneous transfer learning.

一个关于大视觉模型的prompt tuning的综述
A survey on prompt tuning for large visual models.

一个关于个性化联邦学习的综述
A survey on personalized federated learning.

知乎文章
Zhihu articles.

微信公众号
WeChat public account posts.

第一篇对Domain generalization (领域泛化)的综述
The first survey on Domain Generalization.

- 2020 迁移学习最新survey，来自中科院计算所庄福振团队，发表在Proceedings of the IEEE: [A Comprehensive Survey on Transfer Learning](https://arxiv.org/abs/1911.02685)
- 2020 latest survey on transfer learning by the Zhuang Fuzhen team at the Institute of Computing Technology, CAS, published in Proceedings of the IEEE: [A Comprehensive Survey on Transfer Learning].
- 2020 负迁移的综述：[Overcoming Negative Transfer: A Survey](https://arxiv.org/abs/2009.00909" \t "_new)
- 2020 survey on negative transfer: [Overcoming Negative Transfer: A Survey].
- 2020 知识蒸馏的综述: [Knowledge Distillation: A Survey](https://arxiv.org/abs/2006.05525)
- 2020 survey on knowledge distillation: [Knowledge Distillation: A Survey].
- 用transfer learning进行sentiment classification的综述：[A Survey of Sentiment Analysis Based on Transfer Learning](https://ieeexplore.ieee.org/abstract/document/8746210" \t "_new)
- A survey on sentiment classification using transfer learning: [A Survey of Sentiment Analysis Based on Transfer Learning].
- 2019 一篇新survey：[Transfer Adaptation Learning: A Decade Survey](https://arxiv.org/abs/1903.04687" \t "_new)
- 2019 a new survey: [Transfer Adaptation Learning: A Decade Survey].
- 2018 一篇迁移度量学习的综述: [Transfer Metric Learning: Algorithms, Applications and Outlooks](https://arxiv.org/abs/1810.03944)
- 2018 a survey on transfer metric learning: [Transfer Metric Learning: Algorithms, Applications and Outlooks].
- 2018 一篇最近的非对称情况下的异构迁移学习综述：[Asymmetric Heterogeneous Transfer Learning: A Survey](https://arxiv.org/abs/1804.10834" \t "_new)
- 2018 a recent survey on heterogeneous transfer learning in asymmetric cases: [Asymmetric Heterogeneous Transfer Learning: A Survey].
- 2018 Neural style transfer的一个survey：[Neural Style Transfer: A Review](https://arxiv.org/abs/1705.04058" \t "_new)
- 2018 a survey on neural style transfer: [Neural Style Transfer: A Review].
- 2018 深度domain adaptation的一个综述：[Deep Visual Domain Adaptation: A Survey](https://www.sciencedirect.com/science/article/pii/S0925231218306684" \t "_new)
- 2018 a survey on deep visual domain adaptation: [Deep Visual Domain Adaptation: A Survey].
- 2017 多任务学习的综述，来自香港科技大学杨强团队：[A survey on multi-task learning](https://arxiv.org/abs/1707.08114" \t "_new)
- 2017 survey on multi-task learning from the Yang Qiang team at HKUST: [A survey on multi-task learning].
- 2017 异构迁移学习的综述：[A survey on heterogeneous transfer learning](https://link.springer.com/article/10.1186/s40537-017-0089-0" \t "_new)
- 2017 survey on heterogeneous transfer learning: [A survey on heterogeneous transfer learning].
- 2017 跨领域数据识别的综述：[Cross-dataset recognition: a survey](https://arxiv.org/abs/1705.04396" \t "_new)
- 2017 survey on cross-dataset recognition: [Cross-dataset recognition: a survey].
- 2016 [A survey of transfer learning](https://pan.baidu.com/s/1gfgXLXT)。其中交代了一些比较经典的如同构、异构等学习方法代表性文章。
- 2016 [A survey of transfer learning]. This includes introductions to several classic representative works such as homogeneous and heterogeneous learning methods.
- 2015 中文综述：[迁移学习研究进展](https://pan.baidu.com/s/1bpautob" \t "_new)
- 2015 Chinese-language survey: [Progress in Transfer Learning Research].
- 2010 [A survey on transfer learning](http://ieeexplore.ieee.org/abstract/document/5288526/)
- 2010 [A survey on transfer learning].
- Survey on applications - 应用导向的综述：
- Survey on applications — application-oriented surveys:
  - 视觉domain adaptation综述：[Visual Domain Adaptation: A Survey of Recent Advances](https://pan.baidu.com/s/1o8BR7Vc" \t "_new)
  - Survey on visual domain adaptation: [Visual Domain Adaptation: A Survey of Recent Advances].
  - 迁移学习应用于行为识别综述：[Transfer Learning for Activity Recognition: A Survey](https://pan.baidu.com/s/1kVABOYr" \t "_new)
  - Survey on transfer learning for activity recognition: [Transfer Learning for Activity Recognition: A Survey].
  - 迁移学习与增强学习：[Transfer Learning for Reinforcement Learning Domains: A Survey](https://pan.baidu.com/s/1slfr0w1" \t "_new)
  - Transfer learning for reinforcement learning domains: [Transfer Learning for Reinforcement Learning Domains: A Survey].
  - 多个源域进行迁移的综述：[A Survey of Multi-source Domain Adaptation](https://pan.baidu.com/s/1eSGREF4" \t "_new)。
  - Survey on multi-source domain adaptation: [A Survey of Multi-source Domain Adaptation].

一篇关于data-free蒸馏和source-free DA的综述
A survey on data-free distillation and source-free domain adaptation.

通过使用轻量级finetune减少噪音预训练数据对下游任务的影响
Reducing the impact of noisy pretraining data on downstream tasks via lightweight fine-tuning.

- 黑盒的blackbox模型进行个性化迁移学习
- Personalized transfer learning for black-box models.

探索视觉大模型在不平衡问题上的表现
Exploring how large visual models perform under class imbalance.

- 达到对抗鲁棒性和泛化能力的trade off
- Achieving the trade-off between adversarial robustness and generalization.

通过条件不变正则进行OOD泛化
OOD generalization via conditionally invariant regularization.

用信息理论解释迁移学习
Explaining transfer learning using information theory.

基于PAC-Bayesian的domain adaptation
Domain adaptation based on PAC-Bayesian theory.

学习最优的表达
Learning optimal representations.

- 对invariant representation的理论和算法
- Theories and algorithms for invariant representation.
- 基于f-divergence给出新的DA理论和算法
- New DA theories and algorithms based on f-divergence.
- 理论上分析了在OOD问题中invariance什么时候有用
- Theoretical analysis of when invariance is useful in OOD problems.
- 用于噪声环境中的domain adaptation的方法
- Methods for domain adaptation in noisy environments.
- 一个理论上更一般化的MMD差异用于领域自适应
- A more generalized MMD discrepancy for domain adaptation.
- 对统一机器翻译模型进行了理论论证
- Theoretical justification for unified machine translation models.
- 日本理论组大佬Sugiyama的工作，causal transfer learning
- Work by Japanese theory group leader Sugiyama on causal transfer learning.
- 形式化并提出如何避免负迁移
- Formalization and proposals on how to avoid negative transfer.
- 提出一种新的可以强化domain adaptation表现的度量
- Proposed a new metric that can strengthen domain adaptation performance.
- Covariate shift问题的PAC学习理论
- PAC-learning theory for covariate shift problems.
- 学习过程中的知识迁移
- Knowledge transfer during the learning process.
- 一些关于迁移学习的理论分析
- Various theoretical analyses on transfer learning.
- 对deep domain adaptaiton做出了一些理论上的分析
- Theoretical analyses for deep domain adaptation.
- 对domain adaptation进行了一些理论上的分析
- Additional theoretical analyses on domain adaptation.
- 对迁移学习中无监督的WGAN进行了一些理论上的分析
- Theoretical analyses of unsupervised WGAN in transfer learning.

大模型的OOD微调
OOD fine-tuning for large models.

用迁移学习进行基于CSI的定位
Using transfer learning for CSI-based localization.

探索多模态大模型visual prompt tuning的可迁移性
Exploring transferability of visual prompt tuning for multimodal large models.

通过模型合并进行医学迁移学习
Medical transfer learning via model merging.

- Fine-tune a noisy foundation model 基础模型有noisy的时候如何finetune
- Fine-tuning a noisy foundation model — how to fine-tune when the base model is noisy.

比较prompt tuning和全finetune
Comparing prompt tuning and full fine-tuning.

大模型时代一个新研究方向：研究预训练数据的噪声对下游任务影响
A new research direction in the era of large models: studying the effect of noisy pretraining data on downstream tasks.

对大模型进行等边自适应
Edge-wise/adaptive adjustments for large models. *(Note: “等边自适应” wording ambiguous — translated as “edge-wise/adaptive”; if you meant something else, I can adjust.)*

高效使用预训练模型
Efficient utilization of pre-trained models.

通过使用轻量级finetune减少噪音预训练数据对下游任务的影响
Reducing the impact of noisy pretraining data on downstream tasks by using lightweight fine-tuning.

基于分解prompt tuning的参数高效微调
Parameter-efficient fine-tuning via decomposed prompt tuning.

迁移学习用于高维线性回归
Transfer learning for high-dimensional linear regression.

一个关于大视觉模型的prompt tuning的综述
A survey on prompt tuning for large visual models.

一个对parameter efficient fine-tuning的全面介绍
A comprehensive overview of parameter-efficient fine-tuning.

一种以kernel的视角来看待fine-tuning的方法
A kernel-perspective approach to fine-tuning.

为自监督模型提高其 prompt tuning 表现
Improving prompt-tuning performance for self-supervised models.

用动态视觉prompt进行模型适配
Model adaptation via dynamic visual prompts.

参数高效的finetune
Parameter-efficient fine-tuning.

参数高效的迁移学习成就一个好的分类头
Parameter-efficient transfer learning achieves a good classification head.

可训练的pgd用于鲁棒的微调技术
Trainable PGD for robust fine-tuning techniques.

使用参数高效迁移进行视觉语言模型的对比对齐
Contrastive alignment of vision-language models using parameter-efficient transfer.

一个对于参数高效迁移的连续学习框架
A continual learning framework for parameter-efficient transfer.

迁移学习用于脉动计焦虑检测
Transfer learning for pulse-monitor anxiety detection.

用于GNN的自动迁移学习
Automated transfer learning for GNNs.

一种两阶段的参数高效迁移学习
A two-stage parameter-efficient transfer learning method.

调研迁移学习中的集成
Survey of ensembling in transfer learning.

调研masked image对于fine-tuning的影响
Survey on the impact of masked images for fine-tuning.

用预训练数据来做微调
Fine-tuning using pretraining data.

微调的特征用于域自适应
Using fine-tuned features for domain adaptation.

迁移学习中的公平性迁移
Fairness transfer in transfer learning.

用随机回归约束CNN迁移学习
Constrained CNN transfer learning via randomized regression.

通过对预训练模型进行剪枝来进行迁移学习
Transfer learning by pruning pre-trained models.

- 迁移成分分析方法(Transfer component analysis, TCA)
- Transfer Component Analysis (TCA).
- 发表在IEEE Trans. Neural Network期刊上（现改名为IEEE trans. Neural Network and Learning System），前作会议文章发在AAAI-09上
- Published in IEEE Trans. Neural Networks (now IEEE Trans. Neural Networks and Learning Systems); the earlier conference version appeared at AAAI-09.
- [我的解读](https://zhuanlan.zhihu.com/p/26764147?group_id=844611188275965952)
- [My interpretation / commentary].
- 联合分布适配方法（joint distribution adaptation，JDA）
- Joint Distribution Adaptation (JDA).
- 发表在2013年的ICCV上
- Published at ICCV 2013.
- [我的解读](https://zhuanlan.zhihu.com/p/27336930)
- [My interpretation / commentary].
- 测地线流式核方法(Geodesic flow kernel, GFK)
- Geodesic Flow Kernel (GFK).
- 发表在CVPR-12上
- Published at CVPR 2012.
- [我的解读](https://zhuanlan.zhihu.com/p/27782708)
- [My interpretation / commentary].
- 领域不变性迁移核学习(Transfer Kernel Learning, TKL)
- Transfer Kernel Learning (TKL).
- 发表在IEEE Trans. Knowledge and Data Engineering期刊上
- Published in IEEE Transactions on Knowledge and Data Engineering.

教师-学生框架进行跨领域适配
Teacher-student frameworks for cross-domain adaptation.

对CLIP模型进行适配，以用于少样本图片异常检测
Adapting CLIP for few-shot image anomaly detection.

基于流形的DA用于EEG情绪识别
Manifold-based domain adaptation for EEG emotion recognition.

使用大语言模型在图上进行测试时训练
Using large language models for test-time training on graphs.

使用域自适应进行时间序列异常检测
Using domain adaptation for time-series anomaly detection.

语言驱动的零样本 DA
Language-driven zero-shot domain adaptation.

用DA进行眼球追踪
Domain adaptation for eye-tracking.

基于不确定性伪标签的domain adaptation
Domain adaptation with uncertainty-aware pseudo-labeling.

高效DA用于odometry
Efficient domain adaptation for odometry.

研究生态学和水文学中的DA
Domain adaptation research in ecology and hydrology.

通过数据增强来进行source-free DA
Source-free domain adaptation via data augmentation.

通过公共类bias进行半监督DA
Semi-supervised domain adaptation via public-class bias.

用DA进行covid-19检查
Using domain adaptation for COVID-19 screening.

使用集成和测试增强用于DA covid-19
Using ensembling and test-time augmentation for DA in COVID-19.

解决源域的scale bias
Addressing source-domain scale bias.

基础模型帮助领域自适应
Foundation models assisting domain adaptation.

在多源域自适应中使用语言指导
Using language guidance in multi-source domain adaptation.

在嵌入空间中进行半监督域自适应
Semi-supervised domain adaptation in embedding space.

跨领域mixup用于半监督域自适应
Cross-domain mixup for semi-supervised domain adaptation.

多模态领域自适应
Multimodal domain adaptation.

域适应的图分类
Graph classification for domain adaptation.

解释领域复杂性
Explaining domain complexity.

基于prompt的时间序列域自适应
Prompt-based time-series domain adaptation.

对视觉-语言大模型的测试时prompt自适应
Test-time prompt adaptation for vision-language large models.

动态适配用于跨领域小样本分割
Dynamic adaptation for cross-domain few-shot segmentation.

样本加权用于领域自适应
Sample weighting for domain adaptation.

用于回归任务的source-free DA
Source-free domain adaptation for regression tasks.

用预训练模型进行source-free DA
Source-free DA using pre-trained models.

语义分割域适应
Semantic segmentation domain adaptation.

多模型DA用于医疗数据
Multi-model domain adaptation for medical data.

微调的特征用于域自适应
Fine-tuned features used for domain adaptation.

子领域对抗Adaptation
Sub-domain adversarial adaptation.

参数高效的多任务adaptation
Parameter-efficient multi-task adaptation.

用DA检测遥感图像中的炮弹弹坑
Using DA to detect shell craters in remote-sensing images.

机器阅读理解的domain adaptation
Domain adaptation for machine reading comprehension.

噪声环境下的domain adaptation
Domain adaptation under noisy environments.

分析迁移学习中数据的重要性
Analyzing the importance of data in transfer learning.

- 基于不完整实例的对抗模仿学习
- Adversarial imitation learning based on incomplete instances.

提出一个高效的用于移动计算机视觉应用的硬件
Proposed an efficient hardware solution for mobile computer vision applications.

- 将半监督方法应用于迁移学习
- Applying semi-supervised methods to transfer learning.
- 探讨迁移学习中隐私保护的文章
- Papers exploring privacy preservation in transfer learning.
- 解释了视觉相似性和语义相似性的不同
- Explaining the difference between visual similarity and semantic similarity.
- 用于无监督学习的元学习
- Meta-learning for unsupervised learning.
- 将迁移学习思想应用于automl
- Applying transfer learning ideas to AutoML.
- 20190904 arXiv [On the Minimal Supervision for Training Any Binary Classifier from Only Unlabeled Data](https://arxiv.org/abs/1808.10585)
  - Train binary classifiers from only unlabeled data
  - 仅从无标记数据训练二分类器
- 2019-09-04 arXiv [On the Minimal Supervision for Training Any Binary Classifier from Only Unlabeled Data] — Train binary classifiers from only unlabeled data.
- 学习一个可以自适应的kernel
- Learning an adaptive kernel.
- 提出一种混合已有多种距离公式的源领域选择方法
- Proposed a source-domain selection method that mixes multiple distance metrics.
- 通过低秩和重构进行迁移学习
- Transfer learning via low-rank and reconstruction techniques.
- 用迁移学习进行因果推理
- Using transfer learning for causal inference.
- 用一些基于knowledge的方法解释迁移学习
- Explaining transfer learning using knowledge-based methods.
- 20180604 arXiv 在Open set domain adaptation中，用共享和私有部分重建进行问题的解决：[Learning Factorized Representations for Open-set Domain Adaptation](https://arxiv.org/abs/1805.12277" \t "_new)
- 2018-06-04 arXiv on open-set domain adaptation: solving the problem via shared and private-part reconstruction — [Learning Factorized Representations for Open-set Domain Adaptation].

用多个模型做集成一致性训练进行多目标DA
Using ensemble consistency training with multiple models for multi-objective domain adaptation.

- 更通用更一般的domain adaptation
- More generalizable, more universal domain adaptation.
- 基于傅里叶特征的DG
- Domain generalization based on Fourier features.
- 测试时通过熵最小化进行adaptation
- Test-time adaptation via entropy minimization.
- 用神经网络结构搜索做领域自适应
- Domain adaptation via neural architecture search.
- 基于主动学习的DA
- Active learning-based domain adaptation.
- 非均衡的OT用于DA问题
- Unbalanced optimal transport for DA problems.
- 统一pivots和non-pivots，并提供可解释性进行DA情感分析
- Unifying pivots and non-pivots with interpretability for DA sentiment analysis.
- 在任务、数据集、人群之间做泛化
- Generalization across tasks, datasets, and populations.
- 在预训练模型基础上，将梯度作为额外的feature，提高学习表现
- Using gradients as additional features on top of pre-trained models to improve performance.
- 使用目标域的知识来进行domain adaptation
- Leveraging target-domain knowledge for domain adaptation.
- 增强对抗样本的可迁移性
- Enhancing transferability of adversarial examples.
- 仅利用源域数据进行domain randomization
- Domain randomization using only source-domain data.
- 用跨领域嫁接栈进行domain adaptation
- Cross-domain grafting stacks for domain adaptation.
- 域流方法应用于领域自适应和扩展
- Domain flow methods applied to domain adaptation and extension.
- 使用ghost网络来学习可迁移的对抗样本
- Using GhostNet to learn transferable adversarial examples.
- 基于CycleGAN的domain adaptation
- CycleGAN-based domain adaptation.
- Domain randomization和增强
- Domain randomization and augmentation.
- 生成一些可迁移的对抗样本来迷惑神经网络，在各个网络上都表现好
- Generating transferable adversarial examples to fool neural networks, performing well across different models.
- 渐进式选择置信度高的伪标记进行迁移
- Progressive selection of high-confidence pseudo-labels for transfer.
- 用conditional GAN进行domain adaptation
- Conditional GAN-based domain adaptation.
- 不进行对抗训练获得不变特征表达
- Obtaining invariant feature representations without adversarial training.
- 用GAN进行多个domain的字典学习
- Dictionary learning across multiple domains using GANs.
- 用于Domain adaptation的confusion和self-ensembling方法
- Confusion and self-ensembling methods for domain adaptation.
- 提高ADDA方法的精度，使用source domain的label
- Improving ADDA accuracy by using source-domain labels.
- 将autoencoder集成到GAN中，提出相应的两种距离进行度量，提高了GAN的稳定性
- Integrating autoencoders into GANs and proposing two corresponding distances to improve GAN stability.
- 用stacked cycleGAN进行image-to-image的翻译
- Image-to-image translation using stacked CycleGANs.

一篇关于联邦域泛化的综述
A survey on federated domain generalization.

- 半监督+domain generalization

- Semi-supervised + domain generalization.

- 领域泛化用于乳房X射线检查

- Domain generalization applied to mammography.

- 通过音频-视频对齐进行domain generalization
- Domain generalization via audio–video alignment.
- 用集成学习进行domain generalization
- Domain generalization using ensemble learning.
- 尺度不变的domain generalization
- Scale-invariant domain generalization.
- 基于形状进行domain generalization
- Shape-based domain generalization.
- 领域泛化用于医学图像分割
- Domain generalization for medical image segmentation.
  - 不变梯度方差，用于OOD
  - Invariant gradient variance for OOD.
  - 使用Wasserstein DRO进行domain generalization
  - Domain generalization via Wasserstein DRO.
  - 一种新的建模时间序列的迁移学习视角
  - A new transfer-learning perspective for modeling time series.
  - 深度领域泛化用于图像对齐
  - Deep domain generalization for image alignment.
  - 对未知领域识别未知类
  - Recognizing unknown classes in unseen domains.
  - 风格归一化用于DA和DG任务
  - Style normalization for DA and DG tasks.
  - 零次学习的图像识别
  - Zero-shot image recognition.
- 算法首先学习 semantic embeddings 的结构性知识，利用学习到的知识和已知类的 image features 合成未知类的 image features。再利用无标记的未知类数据对合成数据进行修正。 算法假设未知类数据呈混合高斯分布，用 GMM-EM 算法进行无监督修正。
- The algorithm first learns structural knowledge of semantic embeddings, uses that knowledge with image features of known classes to synthesize image features for unknown classes, and then refines the synthesized data using unlabeled unknown-class data. The algorithm assumes unknown-class data follow a Gaussian mixture distribution and applies GMM-EM for unsupervised refinement.

- 传统 ZSL 数据集（如 AwA, CUB）存在规模小，属性标注不丰富等问题。本文提出一个新的属性数据集 LAD 用于测试零样本学习算法。新数据集包含 230 类， 78,017 张图片，标注了 359 种属性。基于此数据集举办了 AI Challenger 零样本学习竞赛。 110+ 支来自海内外的参赛队伍提交了成绩。

- Traditional ZSL datasets (e.g., AwA, CUB) are small and have limited attribute annotations. This paper proposed a new attribute dataset LAD for testing zero-shot learning algorithms. The new dataset contains 230 classes, 78,017 images, and annotations for 359 attributes. An AI Challenger ZSL competition was held based on this dataset, with over 110 teams participating worldwide.

- 针对 L1 （欠拟合） 和 L2 （无特征选择、有偏） 正则项存在的问题，提出 MSplit LBI 用于同时实现特征选择和密集估计。在 Few-shot Learning 和 Zero-shot Learning 两个问题上进行了实验。实验表明 MSplit LBI 由优于 L1 和 L2。针对 ZSL 进行了特征可视化实验。

- To address issues with L1 (underfitting) and L2 (no feature selection, biased) regularizers, MSplit LBI was proposed to achieve both feature selection and dense estimation. Experiments on few-shot and zero-shot learning show MSplit LBI outperforms L1 and L2. Feature visualization experiments for ZSL were also conducted.

- 基于样本合成的零样本学习算法通常将 semantic embeddings 的知识迁移到 image features 以实现 ZSL。然而，这种 training 和 testing space 的不一致，会导致这种迁移失效。因此，本文提出 Space Shift Problem，并针对此问题，提出一种（在 image feature space 和 semantic embedding space 之间）递归传递知识的解决方案。

- Sample-synthesis based ZSL methods typically transfer knowledge from semantic embeddings to image features. However, the mismatch between training and testing spaces can cause transfer failure. This paper defines the Space Shift Problem and proposes a recursive knowledge-transfer solution between image feature space and semantic embedding space.

- 用于多任务学习的gap minimization方法
- Gap-minimization methods for multi-task learning.
  - 利用迁移学习进行关系抽取
  - Relation extraction using transfer learning.
  - 深度高斯过程中的多任务学习
  - Multi-task learning in deep Gaussian processes.
  - 针对多任务学习的知识蒸馏
  - Knowledge distillation for multi-task learning.
  - 用bilevel programming解释多任务学习
  - Interpreting multi-task learning via bilevel programming.
  - 自适应的激活网络用于深度多任务学习
  - Adaptive activation networks for deep multi-task learning.
  - 一种很有效的方法用于多任务学习
  - An effective method for multi-task learning.
  - 多任务人体静止图像分析
  - Multi-task human still-image analysis.
  - 多任务学习中自动任务选择和混淆
  - Automatic task selection and confusion in multi-task learning.
  - 在多个领域之间进行异构多任务度量学习
  - Heterogeneous multi-task metric learning across multiple domains.
  - 通过任务和环境之间进行迁移
  - Transfer across tasks and environments.
  - 在多任务学习中学习任务之间的相关性
  - Learning inter-task correlations in multi-task learning.
  - 许多任务同时学习
  - Learning many tasks jointly.
  - 为多任务学习中的相似度学习提供了一些理论分析
  - Providing theoretical analysis for similarity learning in multi-task learning.
  - 一个用于嵌入式系统的迁移学习框架
  - A transfer learning framework for embedded systems.
  - 将多任务问题看成一个多目标优化问题进行求解
  - Treating multi-task problems as multi-objective optimization.

探索了多任务迁移学习中的不确定性
Explored uncertainty in multi-task transfer learning.

杨强团队、与之前的learning to learning类似，这里提供了一个从经验中学习的learning to multitask框架
Yang Qiang’s team, similar to prior "learning to learn" work, provided a learning-to-multitask framework that learns from experience.

- 在RL中的多智能体迁移

- Multi-agent transfer in RL.

- 深度迁移学习用于强化学习

- Deep transfer learning for reinforcement learning.

- 在强化学习中general reward function的迁移学习

- Transfer learning for general reward functions in RL.

- 对强化学习中的sim-to-real transfer进行理论上的分析

- Theoretical analysis of sim-to-real transfer in RL.

- 用知识图谱进行强化迁移

- Knowledge-graph based transfer in RL.

- 用迁移学习进行机器人定位

- Robot localization using transfer learning.

- 迁移学习用于机器人的强化学习目标搜寻

- Transfer learning for goal-search RL in robotics.

- 隐变量模型用于迁移强化学习的控制

- Latent-variable models for transfer RL control.

- 多个机器人之间的迁移学习

- Transfer learning among multiple robots.

- 提供了在Q learning的任务迁移中一些理论分析

- Provided theoretical analysis for task transfer in Q-learning.

- 将domain adaptation应用于机器人故障检测系统

- Applying domain adaptation to robot fault detection systems.

- 增强学习中的策略迁移

- Policy transfer in reinforcement learning.

- 深度对抗迁移学习用于强化学习

- Deep adversarial transfer learning for RL.

ICML-18 强化迁移学习
ICML 2018: transfer in reinforcement learning.

探索了强化学习中的任务迁移
Explored task transfer in reinforcement learning.

基于后继特征迁移的强化学习
Reinforcement learning based on successor-feature transfer.

用迁移学习来玩星际争霸游戏
Using transfer learning to play StarCraft.

- 分布式度量学习

- Distributed metric learning.

- 在多个领域之间进行异构多任务度量学习

- Heterogeneous multi-task metric learning across multiple domains.

- 通过迁移知识片段来进行异构迁移度量学习

- Heterogeneous transfer metric learning via transferring knowledge fragments.

- 基于特征向量分解的迁移度量学习

- Transfer metric learning based on feature-vector factorization.

- 一篇迁移度量学习的综述

- A survey on transfer metric learning.

基于深度迁移学习的度量学习
Metric learning based on deep transfer learning.

- 衡量距离的算法
- Algorithms for measuring distances.

迁移度量学习
Transfer metric learning.

将流形和统计信息联合起来构成一个domain adaptation框架
Combining manifold and statistical information into a domain adaptation framework.

深度度量迁移学习
Deep metric transfer learning.

黑盒的blackbox模型进行个性化迁移学习
Personalized transfer learning for black-box models.

对联邦域泛化算法进行的
Federated domain generalization algorithms.

在联邦中进行快速的CLIP训练
Fast CLIP training in federated settings.

联邦半监督DA
Federated semi-supervised domain adaptation.

- 联邦之联邦学习、新范式
- Federated learning — a new paradigm.
- 解耦的联邦架构用于Non-IID语音识别
- Decoupled federated architectures for non-IID speech recognition.
- 测试时鲁棒联邦学习
- Test-time robust federated learning.
- 一个关于个性化联邦学习的综述
- A survey on personalized federated learning.
- 通过寻找平坦值进行联邦学习领域泛化
- Federated domain generalization via finding flat minima.
- 个性化联邦学习
- Personalized federated learning.
  - 个性化群体知识迁移
  - Personalized group knowledge transfer.
  - 联邦加权客户端间传输方法，用于联邦持续学习
  - Federated-weighted client-to-client transfer methods for continual federated learning.
  - 使用联邦迁移学习执行跨域推荐任务
  - Cross-domain recommendation using federated transfer learning.
  - 通过对抗性学习对联邦学习过程去除偏见
  - Debiasing federated learning via adversarial learning.
  - 用自适应BN进行个性化联邦学习
  - Personalized federated learning via adaptive BatchNorm.
  - 零次迁移用于联邦学习
  - Zero-shot transfer for federated learning.
  - 联邦多任务学习
  - Federated multi-task learning.
  - 群体知识迁移
  - Group knowledge transfer.
  - 在联邦学习中进行finetune
  - Fine-tuning within federated learning.
  - 联邦学习场景下的多目标DA
  - Multi-objective DA in federated learning scenarios.
  - 第一个将联邦迁移学习用于可穿戴健康监护的工作
  - The first work applying federated transfer learning to wearable health monitoring.

使用 adaptation和DG进行持续分布变化的学习
Learning under continual distribution shift using adaptation and domain generalization.

一个在线学习的框架
An online learning framework.

反向知识迁移的持续学习
Continual learning with reverse knowledge transfer.

- 用mixture of domains进行增量学习
- Incremental learning with a mixture of domains.
  - 对时间序列进行连续adaptation
  - Continuous adaptation for time series.
  - 在序列学习时处理灾难遗忘
  - Handling catastrophic forgetting in sequential learning.
  - 在终身学习中避免灾难遗忘
  - Avoiding catastrophic forgetting in lifelong learning.
- 持续的知识蒸馏
- Continual knowledge distillation.
- 调研在continual learning下teacher-student learning问题的任务相似度
- Survey on task similarity for teacher-student learning under continual learning.
- 隐式梯度的元学习
- Meta-learning with implicit gradients.
- 20180323 arXiv 终身迁移学习与增量学习结合
- 2018-03-23 arXiv: combining lifelong transfer learning with incremental learning.

一种新的终身学习框架，与L2T的思路有一些类似 [Lifelong Learning for Sentiment Classification](https://arxiv.org/abs/1801.02808)
A new lifelong learning framework somewhat similar to L2T: [Lifelong Learning for Sentiment Classification].

安全迁移学习的最新工作
Recent work on secure/robust transfer learning.

- 提高迁移学习对于adversarial robustness的鲁棒性
- Improving adversarial robustness in transfer learning.
- 设计实验来攻击迁移学习的softmax layer
- Designing attacks against the softmax layer in transfer learning.
- 在finetune过程中剪枝来预防后门攻击
- Pruning during fine-tuning to prevent backdoor attacks.
- 设计实验来攻击预训练模型的工作
- Work designing attacks against pre-trained models.
- 第一个设计实验来攻击预训练模型的工作
- The first work that designed experiments to attack pre-trained models.

**awesome_paper_date**

大模型的OOD微调
Out-of-distribution (OOD) fine-tuning for large-scale models.

用迁移学习进行基于CSI的定位
Using transfer learning for CSI-based localization.

教师-学生框架进行跨领域适配
Cross-domain adaptation via a teacher–student framework.

对CLIP模型进行适配，以用于少样本图片异常检测
Adapting the CLIP model for few-shot image anomaly detection.

基于流形的DA用于EEG情绪识别
Manifold-based domain adaptation for EEG emotion recognition.

DA用于图片压缩
Applying domain adaptation to image compression.

使用大语言模型在图上进行测试时训练
Using large language models (LLMs) for test-time training on graphs.

使用域自适应进行时间序列异常检测
Time-series anomaly detection via domain adaptation.

LLM 探索多模态大模型visual prompt tuning的可迁移性
Exploring the transferability of visual prompt tuning for multimodal large language models.

用Mamba结构进行DG
Domain generalization using the Mamba architecture.

语言驱动的零样本 DA
Language-driven zero-shot domain adaptation.

多模态领域自适应
Multimodal domain adaptation.

域适应的图分类
Graph classification through domain adaptation.

解释领域复杂性
Explaining domain complexity.

基于prompt的时间序列域自适应
Prompt-based time-series domain adaptation.

对视觉-语言大模型的测试时prompt自适应
Test-time prompt adaptation for vision–language large models.

用单一网络结构进行开放式domain generalization
Open-set domain generalization using a unified network architecture.

用视觉基础模型进行域泛化语义分割
Domain-generalized semantic segmentation with vision foundation models.

动态适配用于跨领域小样本分割
Dynamic adaptation for cross-domain few-shot segmentation.

样本加权用于领域自适应
Sample weighting for domain adaptation.

用于回归任务的source-free DA
Source-free domain adaptation for regression tasks.

心音图信号自监督的OOD鲁棒性
Self-supervised OOD robustness for phonocardiogram (PCG) signals.

用迁移学习来识别学生课堂行为
Using transfer learning to recognize student classroom behaviors.

一个用于DG的轻量级模块
A lightweight module for domain generalization.

使用参数高效迁移进行视觉语言模型的对比对齐
Contrastive alignment of vision–language models via parameter-efficient transfer.

概率的domain adaptation用于生物医疗图像分割
Probabilistic domain adaptation for biomedical image segmentation.

不平衡的DG用于单细胞分类
Imbalanced domain generalization for single-cell classification.

一种两阶段的参数高效迁移学习
A two-stage parameter-efficient transfer learning approach.

领域自适应用于雾场景的光流
Domain adaptation for optical flow in foggy scenes.

对于预训练和微调的超表示
Hyper-representations for pre-training and fine-tuning.

无需源域的迁移用于图像去雾
Source-free transfer learning for image dehazing.

通过条件不变正则进行OOD泛化
OOD generalization via conditionally invariant regularization.

公平迁移学习
Fair transfer learning.

零次迁移用于联邦学习
Zero-shot transfer for federated learning.

不变梯度方差，用于OOD
Invariant gradient variance for out-of-distribution generalization.

探索对抗性finetune如何帮助BERT
Exploring how adversarial fine-tuning improves BERT.

QA任务中应用对比domain adaptation
Contrastive domain adaptation applied to question-answering tasks.

集成嵌入网络用于domain adaptation
Ensemble embedding networks for domain adaptation.

联邦多任务学习
Federated multi-task learning.

在联邦学习中进行finetune
Fine-tuning within federated learning.

联邦学习场景下的多目标DA
Multi-objective domain adaptation under federated learning scenarios.

学习适用于迁移部分的参数做UDA任务
Learning transferable parameters for unsupervised domain adaptation (UDA) tasks.

通过知识传递，迁移预训练的conditional GAN到新类别
Transferring pre-trained conditional GANs to new categories via knowledge transfer.

从第三人称视频迁移到第一人称
Transferring from third-person to first-person video domains.

迁移学习用于医疗记录管理
Transfer learning for medical record management.

提出一个新的metric用于domain adaptation
Proposing a new metric for domain adaptation.

利用Wasserstein Barycenter进行DA
Domain adaptation using the Wasserstein barycenter.

一个更抽象更一般的domain adaptation定义
A more abstract and general definition of domain adaptation.

通过训练图像对style无法辨别来进行DA和DG
Domain adaptation and generalization by training images to be style-invariant.

基于不确定性的domain generalization
Uncertainty-based domain generalization.

动态算法，用于domain generalization
Dynamic algorithms for domain generalization.

调研在continual learning下teacher-student learning问题的任务相似度
Surveying task similarity in teacher–student learning under continual learning.

用分布估计代替点估计来做domain adaptation
Domain adaptation using distribution estimation instead of point estimation.

持续的知识蒸馏
Continual knowledge distillation.

用多模态transformer做少样本的domain adaptation
Few-shot domain adaptation using multimodal transformers.

跨模态蒸馏用于语音到video的生成
Cross-modal distillation for speech-to-video generation.

用domain adaptation进行地理空间的机器学习
Applying domain adaptation to geospatial machine learning.

**domain_adaptation**

介绍及代表性文章梳理
Introduction and representative works summary.

Domain adaptation，DA，中文可翻译为域适配、域匹配、域适应，是迁移学习中的一类非常重要的问题，也是一个持续的研究热点。Domain adaptation可用于计算机视觉、物体识别、文本分类、声音识别等常见应用中。这个问题的基本定义是，假设源域和目标域的类别空间一样，特征空间也一样，但是数据的分布不一样，如何利用有标定的源域数据，来学习目标域数据的标定？
Domain adaptation (DA), translated in Chinese as “域适配” or “域匹配,” is a crucial subfield of transfer learning and remains an active research area. DA is widely applied in computer vision, object recognition, text classification, and speech recognition. The core definition assumes that the source and target domains share the same feature and label spaces but have different data distributions. The challenge is how to use labeled data from the source domain to infer labels for the target domain.

事实上，根据目标域中是否有少量的标定可用，可以将domain adaptation大致分为无监督（目标域中完全无label）和半监督（目标域中有少量label）两大类。我们这里偏重介绍无监督。
In practice, domain adaptation can be roughly categorized as unsupervised (no labels in the target domain) or semi-supervised (a few labels available). Here, we focus primarily on unsupervised domain adaptation (UDA).

关于迁移学习的理论方面，有三篇连贯式的理论分析文章连续发表在NIPS和Machine Learning上。
Regarding the theoretical foundation of transfer learning, three sequential theoretical papers were published consecutively in *NeurIPS* and *Machine Learning* journals, offering systematic theoretical insights.

**形式化**

Formalization

条件：
Conditions:

源域和目标域的特征空间相同
The feature spaces of the source and target domains are the same.

源域和目标域的类别空间相同
The label spaces of the source and target domains are the same.

比如说，同样都是一台电脑，在不同角度，不同光照，以及不同背景下拍照，图像的数据具有不同的分布，但是从根本上来说，都是一台电脑的图像。Domain adaptation要做的就是，如何根据这些不同分布的数据，很好地学习缺失的标定。
For example, consider taking photos of the same computer under different angles, lighting conditions, or backgrounds—the image distributions vary, but they represent the same object. The goal of domain adaptation is to effectively learn consistent labeling from these distributional variations.

代表方法和文章请见这里。
Representative methods and publications can be found in major DA surveys and repositories.

scholar_TL.md

迁移学习相关学者、机构信息总结

Summary of researchers and institutions related to transfer learning.

这里列出了一些迁移学习领域代表性学者以及他们的最具代表性的工作。一般这些工作都是由他们一作，或者是由自己的学生做出来的。当然，这里所列的文章比起这些大牛发过的文章会少得多，仅仅是他们最知名的工作。欢迎补充！

Here are some representative scholars in the field of transfer learning and their most influential works. Most of these studies were led by the scholars themselves or by their students. The list is not exhaustive—it highlights only their best-known contributions. Additions are welcome!

应用研究

Applied Research

迁移学习领域权威大牛。他所在的课题组基本都做迁移学习方面的研究。迁移学习综述《A survey on transfer learning》就出自杨强老师课题组。他的学生们：

Professor Qiang Yang is a leading figure in transfer learning research. His research group primarily focuses on this field. The influential review A Survey on Transfer Learning originated from his group. His students include:

1). Sinno J. Pan

现为老师，详细介绍见第二条。

Now a faculty member; details provided below.

2). Ben Tan

主要研究传递迁移学习 (transitive transfer learning)。代表文章：

Focuses on transitive transfer learning. Representative work:

3). Derek Hao Hu

主要研究迁移学习与行为识别结合，目前在 Snap 公司。代表文章：

Specializes in integrating transfer learning with activity recognition; currently at Snap Inc. Representative work:

4). Vencent Wencheng Zheng

也做行为识别与迁移学习的结合，目前在新加坡一个研究所当研究科学家。代表文章：2008, 2010.

Also works on the intersection of transfer learning and activity recognition; currently a research scientist in Singapore. Representative works: 2008, 2010.

5). Ying Wei

做迁移学习与数据挖掘相关的研究。代表工作：

Conducts research combining transfer learning with data mining. Representative works:

其他还有很多学生都做迁移学习方面的研究，更多请参考杨强老师主页。

Many other students of Professor Yang have worked on transfer learning; more details can be found on his homepage.

Sinno J. Pan @ NTU

杨强老师学生，比较著名的工作是 TCA 方法。现在在 NTU 当老师，一直都在做迁移学习研究。代表工作：

A student of Qiang Yang, best known for the TCA (Transfer Component Analysis) method. Currently a faculty member at NTU, continuing active research in transfer learning. Representative work:

Transferring Localization Models across Space. AAAI 2008.

Lixin Duan @ UESTC

毕业于 NTU，现在在 UESTC 当老师。代表工作：

Graduated from NTU, now a professor at UESTC. Representative works:

Domain Transfer Multiple Kernel Learning. PAMI 2012.

Visual Event Recognition in Videos by Learning from Web Data. PAMI 2012.

Mingsheng Long @ THU

毕业于清华大学，现在在清华大学当老师，一直在做迁移学习方面的工作。代表工作：

Graduated from Tsinghua University, currently a faculty member there, focusing on transfer learning research. Representative works:

Judy Hoffman @ UC Berkeley & Stanford

Fei-Fei Li 的博士后，现在当老师。她有个学生叫做 Eric Tzeng，做深度迁移学习。代表工作：

Former postdoctoral researcher under Fei-Fei Li; now a faculty member. Her student Eric Tzeng focuses on deep transfer learning. Representative works:

Fuzhen Zhuang @ ICT, CAS

中科院计算所当老师，主要做迁移学习与文本结合的研究。代表工作：

Professor at the Institute of Computing Technology, Chinese Academy of Sciences, focusing on transfer learning combined with text mining. Representative works:

Kilian Q. Weinberger @ Cornell U.

现在康奈尔大学当老师。Minmin Chen 是他的学生。代表工作：

Professor at Cornell University; his student Minmin Chen has collaborated extensively. Representative work:

Co-training for domain adaptation. NIPS 2011. （著名的 Co-training 方法）

(Co-training for domain adaptation, a well-known co-training method.)

Fei Sha @ USC

USC 教授。学生 Boqing Gong 提出了著名的 GFK 方法。代表工作：

Professor at USC; his student Boqing Gong proposed the well-known GFK method. Representative works:

Mahsa Baktashmotlagh @ University of Queensland

现在当老师。主要做流形学习与 domain adaptation 结合。代表工作：

Currently a faculty member, mainly working on combining manifold learning and domain adaptation. Representative works:

Baochen Sun @ Microsoft

现在在微软。著名的 CoRAL 系列方法的作者。代表工作：

Currently at Microsoft, author of the well-known CoRAL series of methods. Representative works:

Wenyuan Dai

著名的第四范式创始人，虽然不做研究了，但是当年求学时几篇迁移学习文章至今都很高引。代表工作：

Founder of Fourth Paradigm; although no longer in academia, several of his early transfer learning papers remain highly cited. Representative works:

理论研究

Theoretical Research

Arthur Gretton @ UCL

主要做 two-sample test。代表工作：

Specializes in two-sample testing. Representative works:

很多迁移学习的理论工作由他给出。代表工作：

Many theoretical foundations of transfer learning were developed by him. Representative works:

Alex Smola @ CMU

也是做一些机器学习的理论工作，和上面两位合作比较多。代表工作非常多，不列了。

Also conducts theoretical work in machine learning, often collaborating with the above researchers. Too many representative works to list.

John Blitzer @ Google

著名的 SCL 方法提出者，现在也在做机器学习。代表工作：

Proposed the well-known SCL (Structural Correspondence Learning) method; currently works at Google on ML research. Representative works:

Yoshua Bengio @ U. Montreal

深度学习领军人物，主要做深度迁移学习的一些理论工作。代表工作：

A pioneer of deep learning, focusing on theoretical aspects of deep transfer learning. Representative works:

Geoffrey Hinton @ U. Toronto

深度学习领军人物，也做深度迁移学习的理论工作。

A leading figure in deep learning who has also contributed to theoretical research in deep transfer learning.

transfer_learning_application

迁移学习的应用，按照时间顺序倒序排列。

Applications of transfer learning, listed in reverse chronological order.

不平衡的DG用于单细胞分类

Imbalanced domain generalization for single-cell classification.

领域自适应用于雾场景的光流

Domain adaptation for optical flow in foggy environments.

使用CLIP进行域泛化的目标检测

Domain-generalized object detection using CLIP.

语义分割域适应

Domain adaptation for semantic segmentation.

用DA进行COVID-19预测

Using domain adaptation for COVID-19 prediction.

用DA检测遥感图像中的炮弹弹坑

Detecting shell craters in remote-sensing images using domain adaptation.

域泛化用于高光谱图像分类

Domain generalization for hyperspectral image classification.

无需源域的迁移用于图像去雾

Source-free transfer learning for image dehazing.

公平迁移学习

Fair transfer learning.

小样本迁移学习用于图像分类

Few-shot transfer learning for image classification.

用迁移学习进行印度语的场景文字识别

Transfer learning for scene text recognition in Indian languages.

解耦公共和私有表征进行目标检测

Decoupling shared and private representations for object detection.

迁移学习用于precolation

Transfer learning applied to percolation modeling.

迁移学习用于癌症诊断

Transfer learning for cancer diagnosis.

子任务驱动的长尾人物搜索

Subtask-driven long-tailed person re-identification.

一个大规模的生物图像数据集用于迁移学习

A large-scale biological image dataset for transfer learning.

领域泛化用于乳房X射线检查

Domain generalization for mammogram analysis.

使用迁移学习和多数投票进行动作识别

Action recognition using transfer learning and majority voting.

跨模态的DA用于医学图像分割

Cross-modal domain adaptation for medical image segmentation.

用隐式图像分解进行光照迁移

Illumination transfer via implicit image decomposition.

用领域自适应进行跨模态的视频检索

Cross-modal video retrieval using domain adaptation.

用迁移学习进行年龄和性别预测

Transfer learning for age and gender prediction.

测试时adaptation用于视频语义分割

Test-time adaptation for video semantic segmentation.

半监督方法FlexMatch和统一算法库TorchSSL

Semi-supervised method FlexMatch and unified library TorchSSL.

从第三人称视频迁移到第一人称

Transfer learning from third-person to first-person video domains.

自适应的领域特异归一化用于ReID

Adaptive domain-specific normalization for person re-identification.

一个用于domain adaptation做语义分割的新数据集

A new dataset for semantic segmentation under domain adaptation.

一个可迁移的人-物交互检测模型

A transferable human–object interaction detection model.

做航空图像分割

Aerial image segmentation using transfer learning.

渐进式的DA用于物体检测

Progressive domain adaptation for object detection.

基于合成数据的跨域互补学习人体部位分割

Cross-domain complementary learning for human part segmentation based on synthetic data.

深度特征迁移用于低分辨率图像分类

Deep feature transfer for low-resolution image classification.

渐进式迁移学习用于RE-ID

Progressive transfer learning for person re-identification.

用GAN进行化妆的迁移

Using GAN-based transfer learning for makeup synthesis.

DA应用于鸟瞰图像语义分割

Domain adaptation applied to bird’s-eye-view semantic segmentation.

用迁移学习进行中文手写体识别

Transfer learning for Chinese handwriting recognition.

无监督领域自适应用于多模态行人检测

Unsupervised domain adaptation for multimodal pedestrian detection.

将卷积网络用于地理学上的domain shift问题

Applying convolutional networks to address domain shifts in geography.

用迁移学习检测路面情况

Transfer learning for road condition detection.

用迁移学习进行单眼深度估计

Transfer learning for monocular depth estimation.

迁移学习用于肺癌检测

Transfer learning for lung cancer detection.

迁移学习用于低分辨率下的蛋白质结构分类

Transfer learning for protein structure classification at low resolution.

通过双语言进行对齐预训练进行零资源的跨语言迁移

Zero-resource cross-lingual transfer via bilingual alignment pretraining.

用统一的预训练进行语言表征建模

Unified pretraining for language representation modeling.

分析了跨语言迁移方法的时间

Temporal analysis of cross-lingual transfer methods.

关于用领域自适应进行神经机器翻译的综述

A review on applying domain adaptation to neural machine translation.

检测英国脱欧 Twitter 中的心理压力

Detecting psychological stress from Brexit-related Twitter data.

DA用于机器翻译任务上

Domain adaptation applied to machine translation.

用于QA任务的多语言迁移学习

Multilingual transfer learning for question answering tasks.

用BERT结合主动学习进行低资源的NLP任务

Combining BERT with active learning for low-resource NLP tasks.

跨语言和领域的预训练模型用于文本分类

Cross-lingual and cross-domain pretrained models for text classification.

领域自适应用于word embedding对齐

Domain adaptation for word embedding alignment.

用迁移学习分析语言中的目标

Analyzing linguistic targets through transfer learning.

零资源的跨语言NER

Zero-resource cross-lingual named entity recognition.

基于实例的迁移学习用于多语言的retrieval

Instance-based transfer learning for multilingual retrieval.

一篇无监督预训练用于自然语言生成的综述

A review of unsupervised pretraining for natural language generation.

无监督DA用于阅读理解

Unsupervised domain adaptation for reading comprehension.

有监督的多模态DA用于VQA任务

Supervised multimodal domain adaptation for visual question answering.

两次finetune用于answer sentence selection

Dual fine-tuning for answer sentence selection.

迁移学习用于否定检测

Transfer learning for negation detection.

对抗迁移用于aspect层级的情感分析

Adversarial transfer for aspect-level sentiment analysis.

一个基于transformer的假新闻检测挑战

A transformer-based fake news detection challenge.

综述了最近迁移学习在NLP的一些进展

A review summarizing recent advances in transfer learning for NLP.

用迁移学习进行对话中的情绪识别

Transfer learning for emotion recognition in dialogue.

统一的语言模型预训练用于自然语言理解和生成

Unified language model pretraining for natural language understanding and generation.

通过社交网络数据预测传染病并进行语言模型的迁移

Predicting infectious diseases through social media data and transferring language models.

调查了MAML方法用于低资源的NMT问题的表现

Surveying the performance of MAML methods for low-resource neural machine translation.

迁移学习用于情感分类

Transfer learning for sentiment classification.

从机器理解到序列模型迁移

Transfer learning from machine comprehension to sequential modeling.

跨语言的NMT模型迁移

Cross-lingual transfer of neural machine translation models.

用迁移学习进行叽叽喳喳聊天识别

Transfer learning for Twitter-style chat recognition.

用多任务学习进行任务依赖的情感分析

Task-dependent sentiment analysis using multitask learning.

利用迁移学习进行产品信息的对话

Product information dialogue systems via transfer learning.

用深度迁移学习进行恶意软件分类

Deep transfer learning for malware classification.

用迁移学习进行VQA任务

Transfer learning for visual question answering.

迁移学习用于情感分类

Transfer learning for emotion classification.

无监督迁移学习用于语言理解

Unsupervised transfer learning for language understanding.

用string kernel进行迁移学习跨领域文本分类

Cross-domain text classification using transfer learning with string kernels.

20180530 MNRAS 用迁移学习检测银河星系兼并

MNRAS 2018 — Using transfer learning to detect galaxy mergers.

20180524 KDD-18 用迁移学习方法进行人们的ID迁移

KDD 2018 — Applying transfer learning for human ID migration.

20180421 arXiv 采用联合分布适配的深度迁移网络用于工业生产中的错误诊断

arXiv 2018 — Deep transfer networks using joint distribution adaptation for fault diagnosis in industrial production.

迁移学习简介

Introduction to Transfer Learning

迁移学习（transfer learning）通俗来讲，就是运用已有的知识来学习新的知识，核心是找到已有知识和新知识之间的相似性，用成语来说就是举一反三。

Transfer learning, in simple terms, refers to using existing knowledge to learn new knowledge. Its core idea is to identify the similarities between what is already known and what needs to be learned — essentially, learning by analogy.

由于直接对目标域从头开始学习成本太高，我们故而转向运用已有的相关知识来辅助尽快地学习新知识。

Since learning a new task or target domain from scratch can be expensive and time-consuming, transfer learning aims to leverage existing related knowledge to accelerate the learning process.

比如，已经会下中国象棋，就可以类比着来学习国际象棋；已经会编写 Java 程序，就可以类比着来学习 C#；已经学会英语，就可以类比着来学习法语；等等。

For example, if one already knows how to play Chinese chess, it is easier to learn international chess by analogy; if one can program in Java, learning C# becomes easier; similarly, learning French is facilitated by prior knowledge of English.

世间万事万物皆有共性，如何合理地找寻它们之间的相似性，进而利用这个桥梁来帮助学习新知识，是迁移学习的核心问题。

Everything in the world shares some commonality. The essence of transfer learning lies in identifying these similarities and building bridges to efficiently acquire new knowledge.

图1 不同位置、不同传感器的迁移标定。已知一个房间中 A 点的 WiFi 信号与相应的人体行为，如何标定另一个房间中 C 点的蓝牙信号？

Figure 1. Transfer calibration across different locations and sensors. Given the WiFi signal and corresponding human activity at point A in one room, how can we calibrate the Bluetooth signal at point C in another room?

具体地，在迁移学习中，我们已有的知识叫做源域（source domain），要学习的新知识叫目标域（target domain）。

Specifically, in transfer learning, existing knowledge is referred to as the source domain, while the new task or data to be learned is called the target domain.

迁移学习研究如何把源域的知识迁移到目标域上。

Transfer learning investigates how to transfer knowledge from the source domain to the target domain.

特别地，在机器学习领域中，迁移学习研究如何将已有模型应用到新的不同的、但是有一定关联的领域中。

In the field of machine learning, transfer learning focuses on adapting existing models to new but related domains.

传统机器学习在应对数据的分布、维度，以及模型的输出变化等任务时，模型不够灵活、结果不够好，而迁移学习放松了这些假设。

Traditional machine learning methods often assume that the training and testing data come from the same distribution, and they struggle when data distributions, feature dimensions, or output spaces differ. Transfer learning relaxes these assumptions.

在数据分布、特征维度以及模型输出变化条件下，有机地利用源域中的知识来对目标域更好地建模。

By organically leveraging the knowledge from the source domain, transfer learning enables better modeling of the target domain under distributional, dimensional, or output variations.

另外，在有标定数据缺乏的情况下，迁移学习可以很好地利用相关领域有标定的数据完成数据的标定。

Moreover, when labeled data in the target domain are scarce, transfer learning can effectively use labeled data from related domains for calibration and training.

图2 迁移学习与传统机器学习的不同。

Figure 2. The distinction between traditional machine learning and transfer learning.

(a) 传统机器学习对不同的学习任务建立不同的模型；(b) 迁移学习利用源域中的数据将知识迁移到目标域，完成模型建立。

(a) Traditional machine learning builds separate models for different tasks.

(b) Transfer learning transfers knowledge from the source domain to the target domain to build models more efficiently.

插图来自：Sinno Jialin Pan 和 Qiang Yang，《A Survey on Transfer Learning》，IEEE TKDE 2010。

Illustration adapted from Sinno Jialin Pan and Qiang Yang, “A Survey on Transfer Learning,” IEEE Transactions on Knowledge and Data Engineering, 2010.

迁移学习按照学习方式可以分为基于样本的迁移、基于特征的迁移、基于模型的迁移，以及基于关系的迁移。

Transfer learning can be categorized by learning strategy into four main types: sample-based, feature-based, model-based, and relation-based transfer learning.

基于样本的迁移通过对源域中有标定样本的加权利用完成知识迁移；

Sample-based transfer learning performs knowledge transfer by reweighting or selecting labeled samples from the source domain.

基于特征的迁移通过将源域和目标域映射到相同的空间（或者将其中之一映射到另一个的空间中）并最小化源域和目标域的距离来完成知识迁移；

Feature-based transfer learning maps the source and target domains into a shared feature space (or maps one into the other) and minimizes their distributional distance to achieve transfer.

基于模型的迁移将源域和目标域的模型与样本结合起来调整模型的参数；

Model-based transfer learning fine-tunes or adjusts model parameters by jointly considering data and model structures from both domains.

基于关系的迁移则通过在源域中学习概念之间的关系，然后将其类比到目标域中，完成知识的迁移。

Relation-based transfer learning learns relationships between concepts in the source domain and analogically applies them to the target domain.

理论上，任何领域之间都可以做迁移学习。

In theory, transfer learning can be applied between any two domains.

但是，如果源域和目标域之间相似度不够，迁移结果并不会理想，出现所谓的负迁移情况。

However, when the similarity between the source and target domains is insufficient, the transfer may fail or even degrade performance — a phenomenon known as negative transfer.

比如，一个人会骑自行车，就可以类比学电动车；但是如果类比着学开汽车，那就有点天方夜谭了。

For instance, someone who can ride a bicycle can easily learn to ride an electric bike, but drawing an analogy to driving a car would be unrealistic.

如何找到相似度尽可能高的源域和目标域，是整个迁移过程最重要的前提。

Thus, identifying the most similar and relevant source and target domains is the key prerequisite for effective transfer learning.

迁移学习方面，代表人物有香港科技大学的 Qiang Yang 教授，南洋理工大学的 Sinno Jialin Pan，以及第四范式的 CEO 戴文渊等。

Leading figures in transfer learning include Professor Qiang Yang (Hong Kong University of Science and Technology), Professor Sinno Jialin Pan (Nanyang Technological University), and Mr. Wenyuan Dai (CEO of Fourth Paradigm).

代表文献是 Sinno Jialin Pan 和 Qiang Yang 的《A Survey on Transfer Learning》。

Their representative work is “A Survey on Transfer Learning” by Sinno Jialin Pan and Qiang Yang.

参考资料

References

该部分总结基于公开教材与研究综述整理，用于教学与科研参考。

This section is compiled from publicly available literature and review papers for educational and research reference.
